# Supplementary material for: Isoform-dependent lysosomal degradation and internalization of apolipoprotein E requires autophagy proteins
Source: PubMed Central journal article supplement (PMC8917355; doi:10.1242/jcs.258687), 2022-01-25
Supplement: joces-135-258687-s1.pdf [file joces-135-258687-s1.pdf]

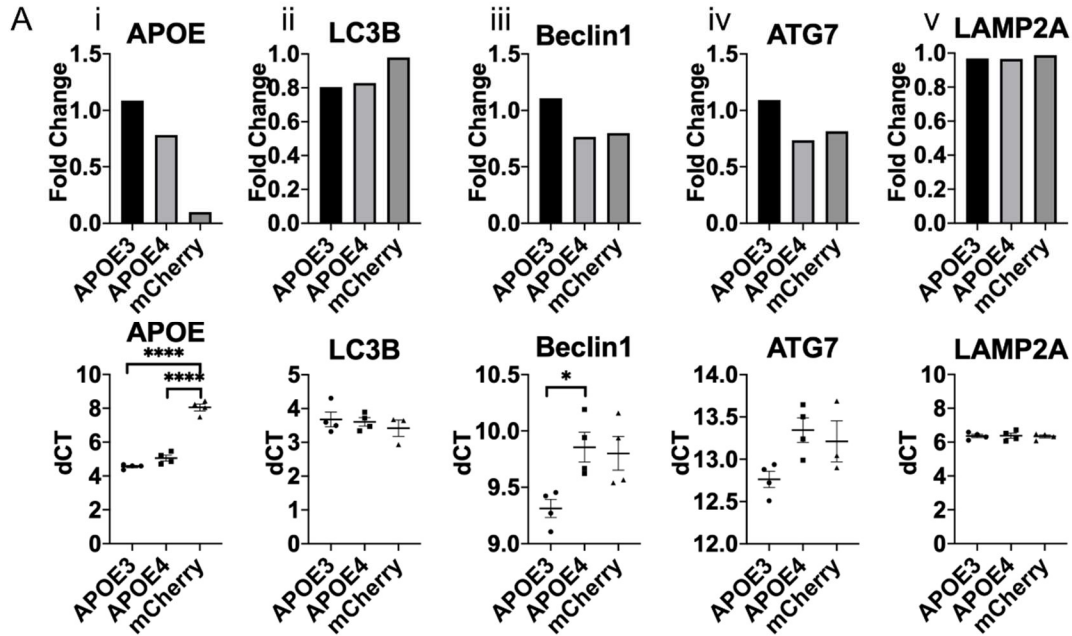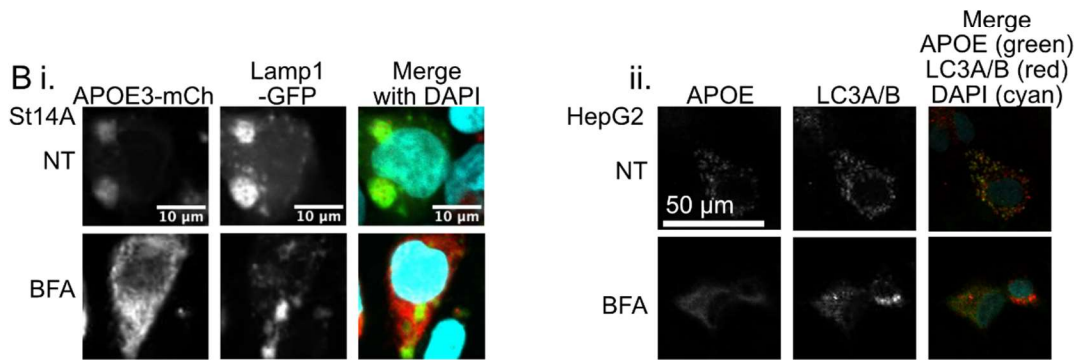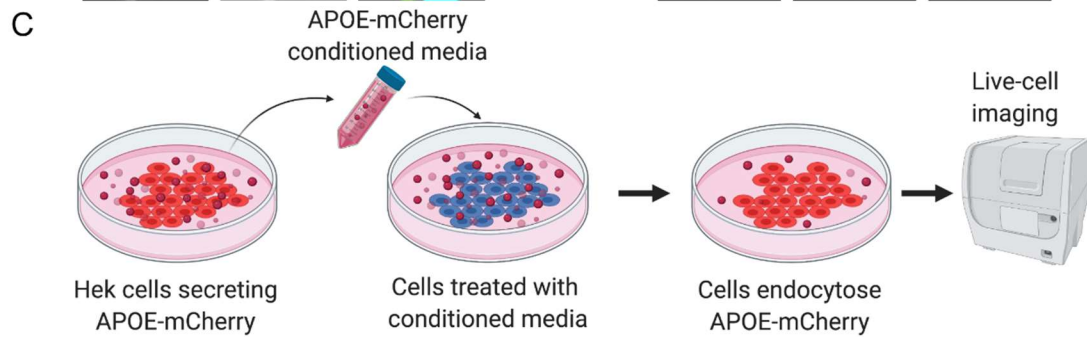

**D Endocytosis of APOE3-mCh**

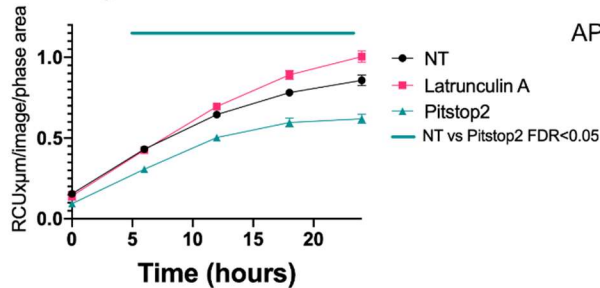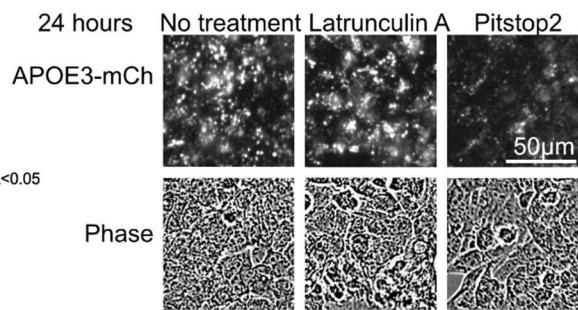

**Fig. S1. APOE is degraded by autophagy.** (A) 4 wells of HEK293 cells expressing APOE3 or 4-mCh were harvested for qPCR. dCT values were compared using one-way ANOVA. Ai: APOE, Aii: LC3B, Aiii: Beclin1, Aiv:ATG7, Av:LAMP2A. (Bi) HEK293 cells stably expressing APOE3-mCh were transfected with CellLight Lamp1-GFP and treated for 4 hours with BFA, then imaged by confocal microscopy, 3 images per well, 4 wells per treatment. (Bii) HepG2 cells endogenously expressing APOE3 were stained for APOE and LC3A/B, treated with BFA, then imaged by confocal microscopy, 3 images per well, 4 wells per treatment. (C) Conditioned media was collected from HEK293 cells stably expressing APOE-mCh. HepG2 cells were treated with this conditioned media, and imaged live using Incucyte. (D) HepG2 cells were treated with APOE-mCh conditioned media and Pitstop2 (1:1000) or Latrunculin A (50  $\mu$ M) and imaged by incucyte.

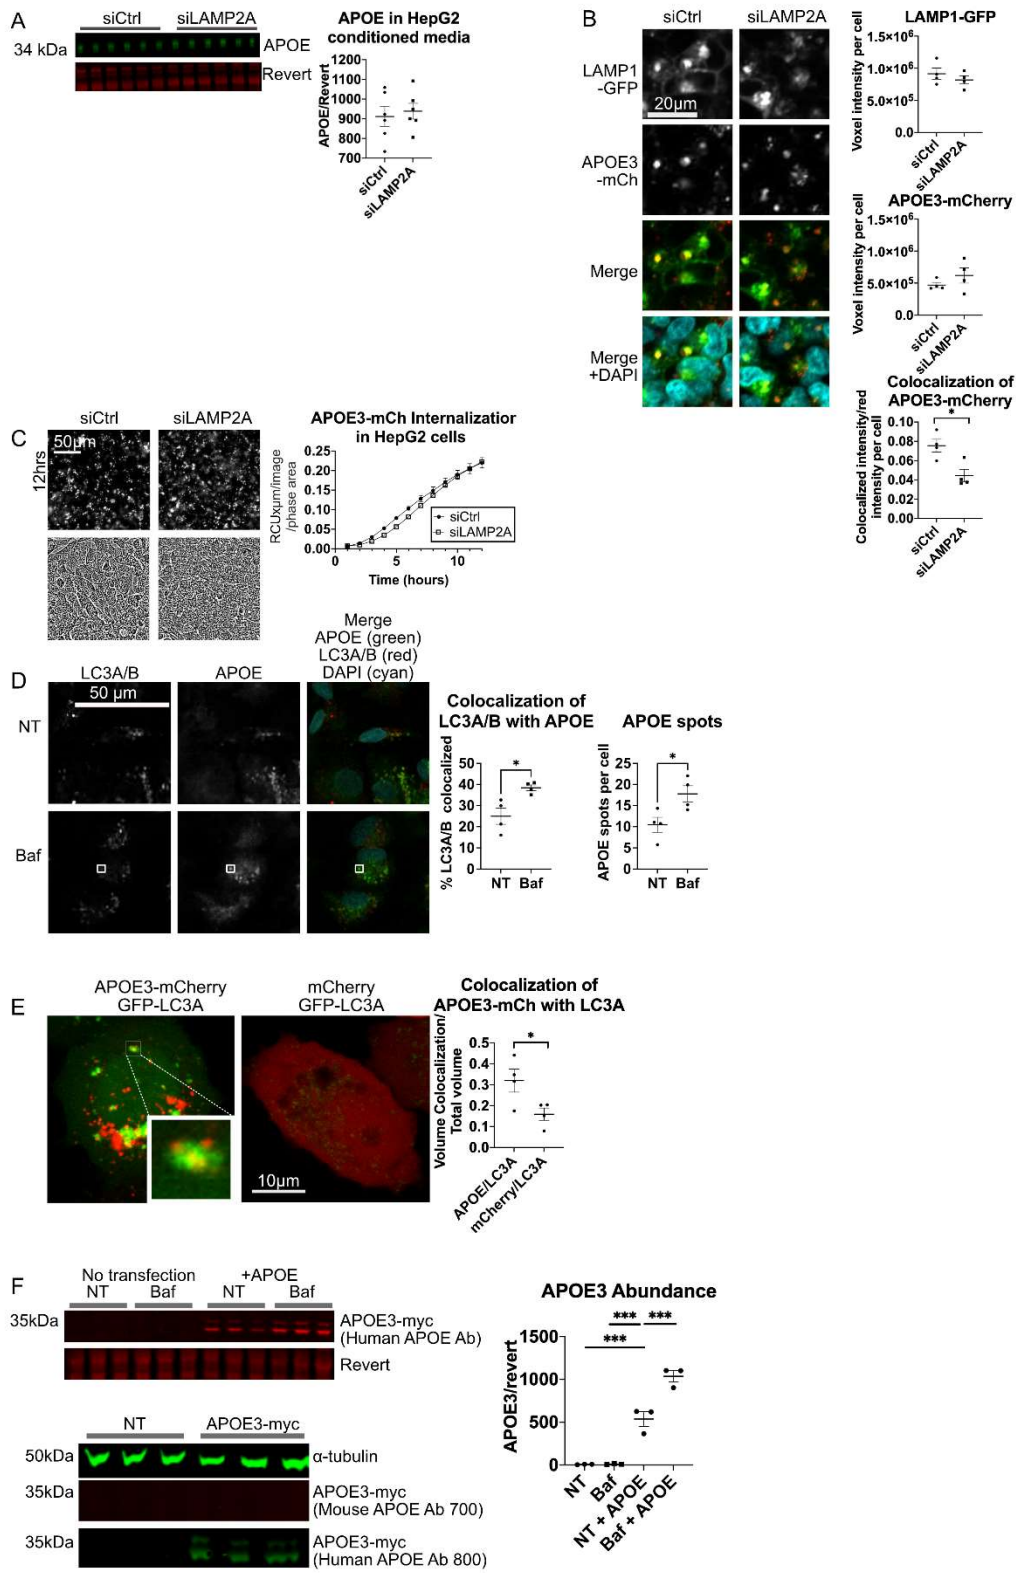

**Fig. S2. Endogenous APOE is not detected in ST14A cells.** (A) Abundance of APOE in HepG2 conditioned media after transfection with siLAMP2A. Media was changed 24 hours after transfection, and conditioned media was collected 24 hours later. 15  $\mu$ L of media was analyzed. (B) HEK293 cells expressing APOE3-mCh were transfected with Lamp1-GFP. n=3 images per well taken at 20x by confocal microscopy, 3 wells per image. (C) HepG2 cells transfected with siLAMP2A were treated with conditioned media from HEK293T cells secreting APOE3-mCh. Cells were imaged for 12 hours every hour and fluorescence quantified using Incucyte. Control and LAMP2A knockdown were compared by two-way repeated measures ANOVA adjusted for multiple comparisons. (D) HepG2 cells were stained for APOE and L3A/B with and without 4 hour Baf treatment. Colocalization was quantified using Imaris. (E) APOE3-mCh or mCh alone were co-transfected into HeLa cells with GFP-LC3A.  $P < 0.05$  by student's two-tailed T test. n= 4 wells per construct, 3 images per well, at least 50 cells total. Co-localization was quantified using Imaris software. (F) ST14A cells were transiently transfected with APOE3-myc-flag or vector. Cells were treated with or without Baf (50nM 4hrs) and lysed for western blot analysis. One-way ANOVA with Tukey correction for multiple comparisons was used to compare NT+APOE to other groups.  $p < 0.001$  indicated by \*\*\*. Antibody detecting mouse/rat APOE does not detect any expression in ST14A cells, and antibody against human APOE detects expression in transfected cells only.

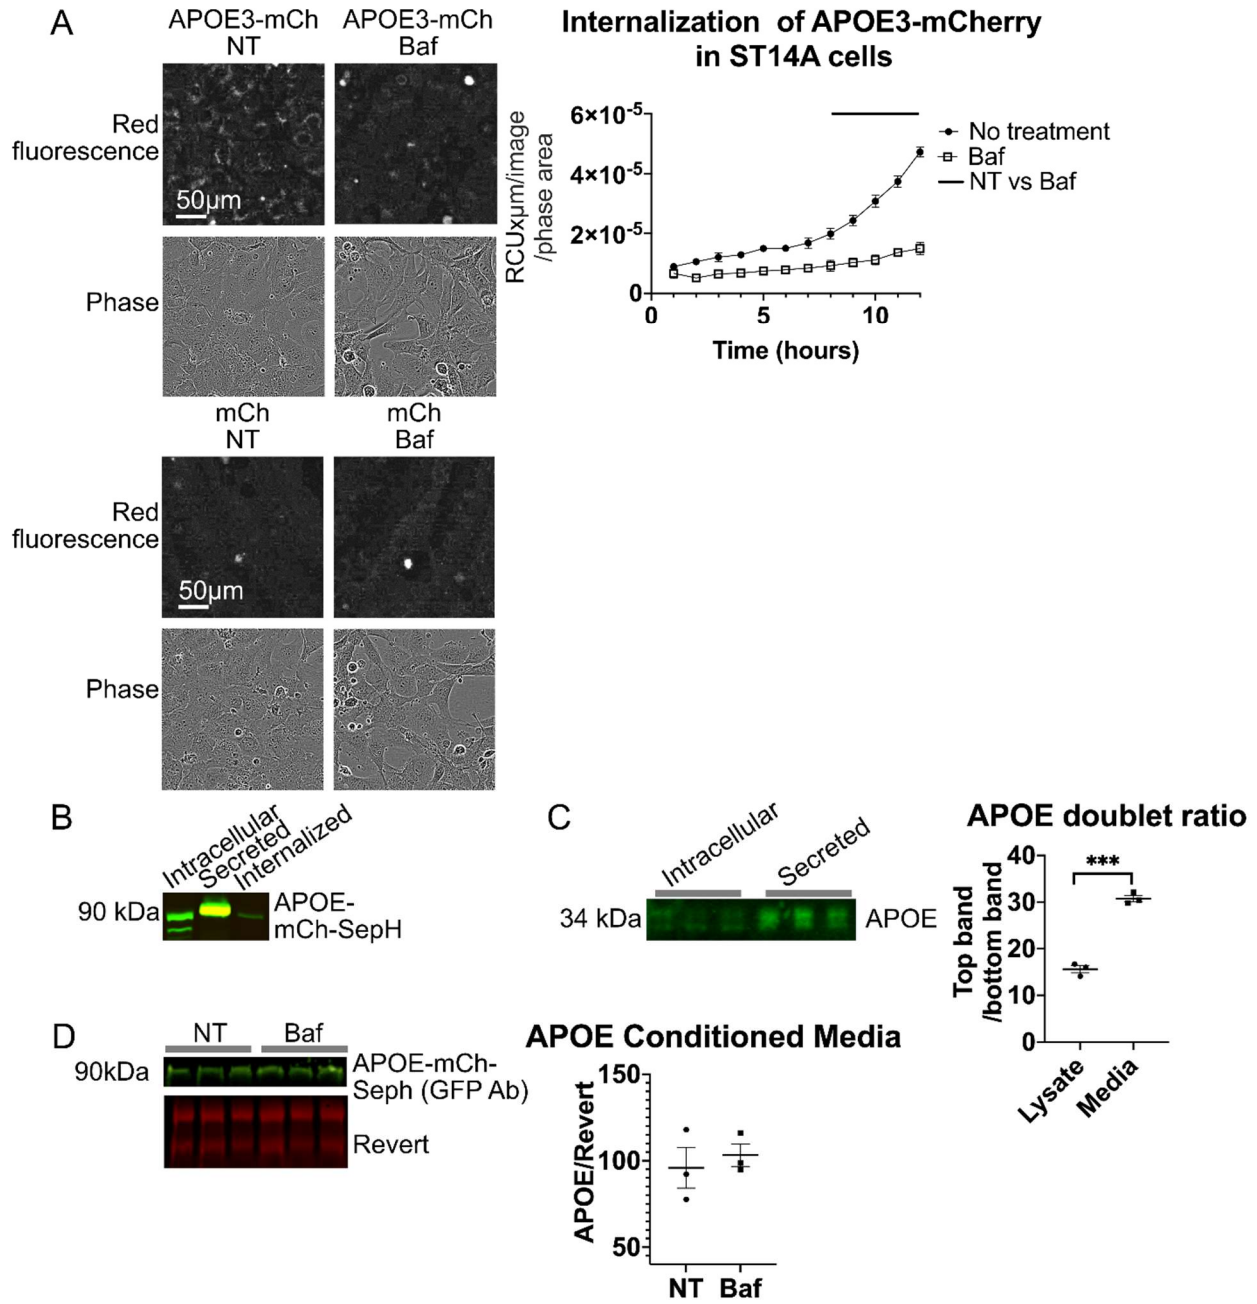

**Fig. S3. Bafilomycin A1 blocks internalization of APOE.** (A) ST14A cells were cultured in conditioned media containing APOE-mCh with or without Baf. Fluorescence intensity was quantified using Incucyte Live cell analysis systems and normalized to phase confluence. Bars indicate time points at which significance was found according to two-way repeated measures ANOVA corrected for multiple comparisons at false discovery rate <0.05. (B) Lane labeled "intracellular" is lysate from Hek293T cells transfected with dual-tagged APOE3; lane labeled "secreted" is conditioned media from these cells. Lane labeled "endocytosed" is ST14A cell lysate following treatment with Hek293T conditioned media. Experiment performed in triplicate. Antibody against APOE was used in red (NIR 700), antibody against GFP was used in green (NIR 800). (C) HepG2 cell lysate (20 µg) and conditioned media (20L). (D) Conditioned media was collected from ST14A cells expressing APOE-mCh-SepH, with or without Baf (50nM, 4hrs). 20 µL of media was run on western blot and normalized to total protein stain.

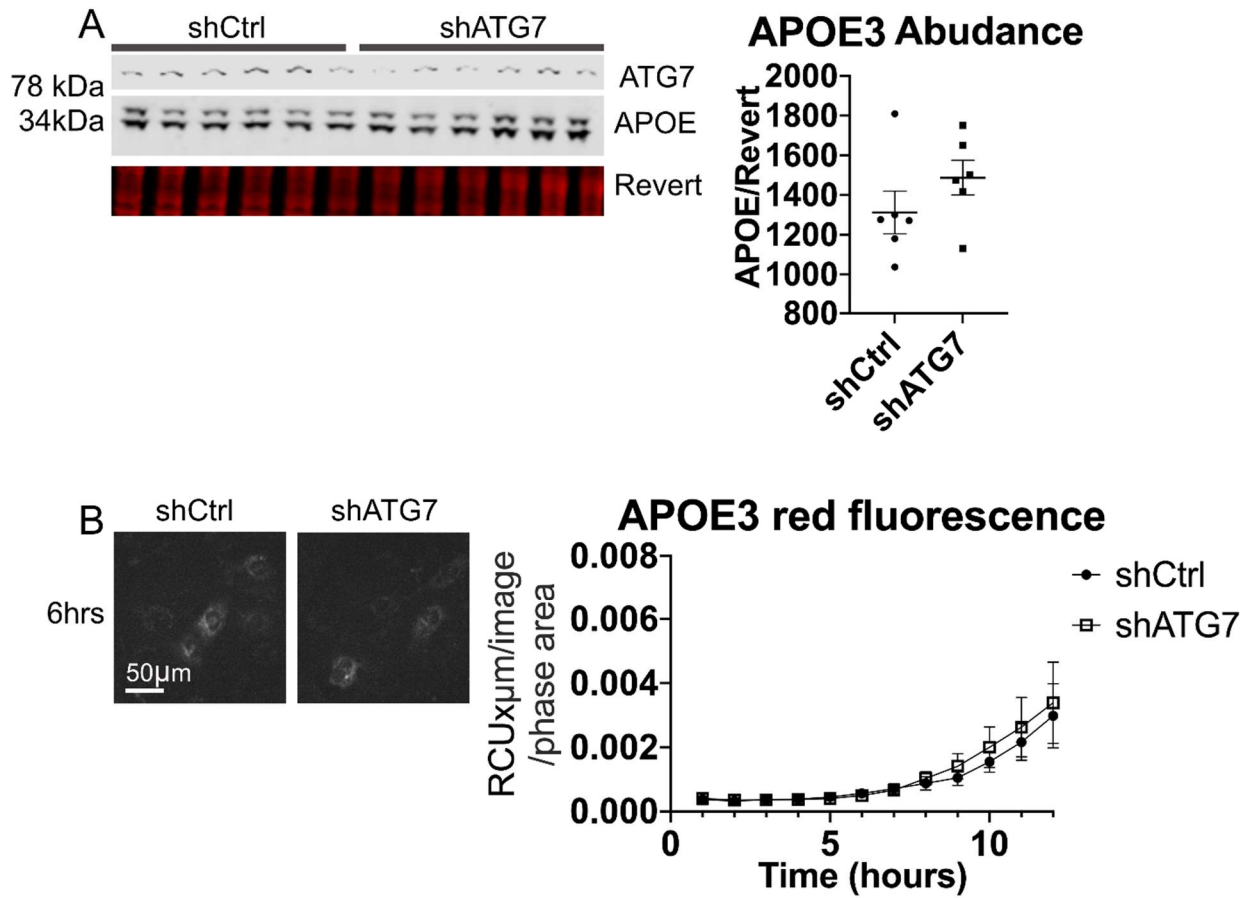

**Fig. S4. Macro-autophagy does not contribute to APOE3 degradation in ST14A cells. (A-B)** ST14A cells were co-transfected with APOE3 and shRNA against ATG7. APOE3 abundance was analyzed by western blot (A) and fluorescence quantified by Incucyte (B). Student's two-tailed T test was performed to analyze western blots, and two-way repeated measures ANOVA adjusted for multiple comparisons was performed to analyze fluorescent intensity of live cell images.

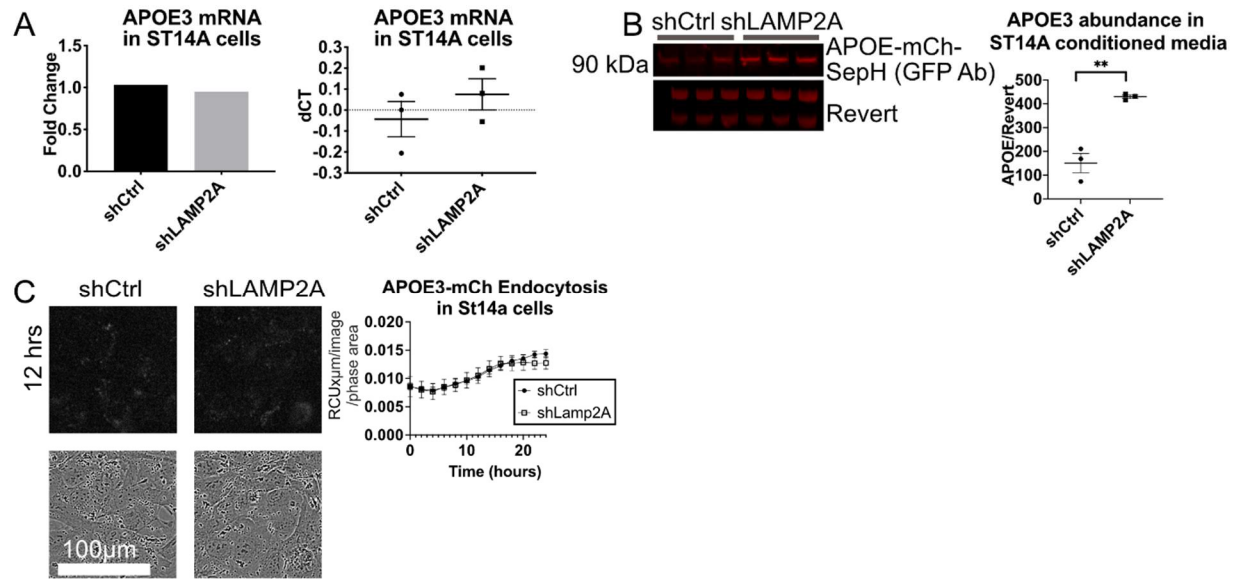

**Fig. S5. LAMP2A knockdown does not affect APOE transcription, secretion, or internalization in ST14A cells.** (A) Knockdown of LAMP2A by shRNA does not increase APOE transcript in ST14A cells. n=3 wells. (B) Abundance of APOE in media conditioned by ST14A cells transfected with APOE3 and LAMP2A shRNA. (C) ST14A cells were transfected with shLAMP2A and treated with conditioned media from HEK293T cells secreting APOE3-mCh.



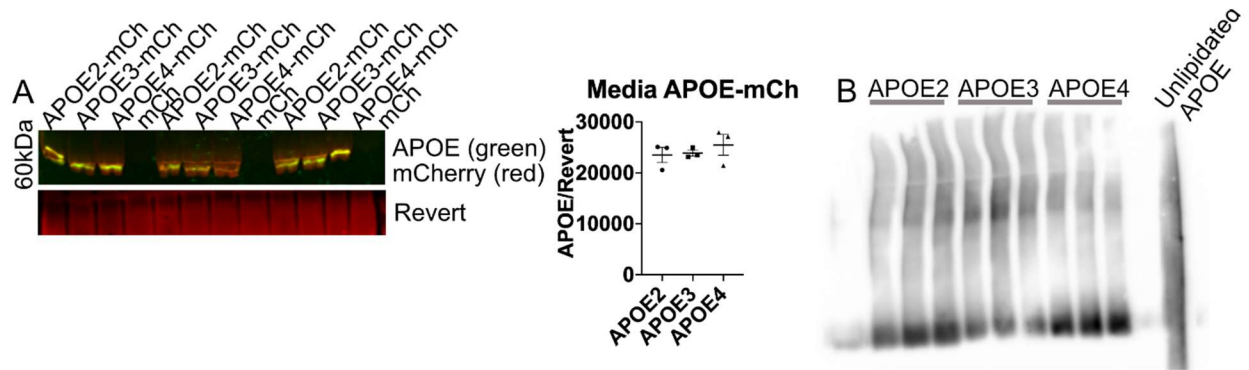

**Fig. S6. Fluorescently tagged APOE is secreted by HEK293T cells.** (A) 20 $\mu$ L of media conditioned by HEK293T cells transfected with APOE-mCh constructs was analyzed by western blot. One-way ANOVA analysis of APOE2, APOE3, and APOE4 levels revealed no significant difference in levels. No bands were detected in cells expressing mCh-vector, suggesting the vector is not secreted into media alone. (B) Conditioned media was assessed by native gel to demonstrate that APOE secreted from HEK293T cells is lipidated.

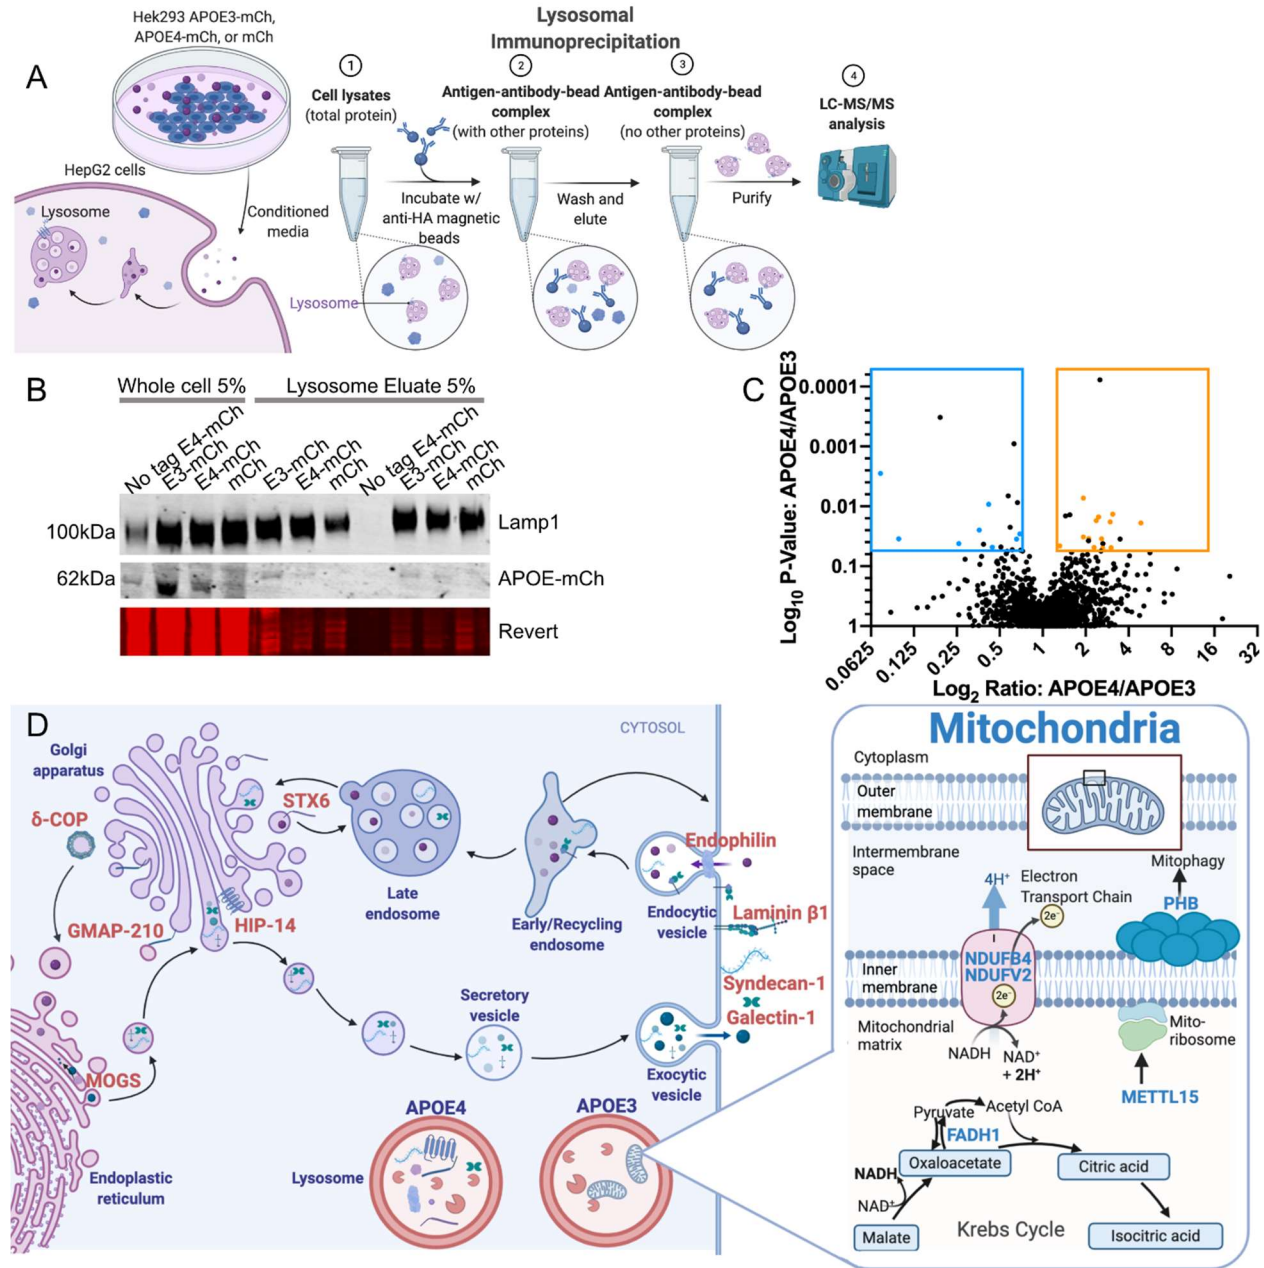

**Fig. S7. Immunoprecipitation and proteomic analysis of lysosomes in cells endocytosing APOE.** (A-B) Lysosomes were immunoprecipitated and proteomic contents analyzed by mass spectrometry from HepG2 cells treated for 24 hours with conditioned media from HEK293 cells expressing APOE3 or E4-mCh. (C) Proteomics of lysosomes was analyzed by ANOVA.  $n=4$  samples per group. Orange and blue boxes indicate significantly ( $p<0.05$ ) reduced and increased proteins in APOE4-treated samples relative to APOE3-treated samples, respectively. Proteins that were not significantly altered in the same direction as Vector relative to APOE3 are represented by colored dots. (D) Proteins labeled in orange indicate increase in APOE4 lysosomes relative to APOE3, blue indicates decrease in APOE4 lysosomes. Created with BioRender.com.

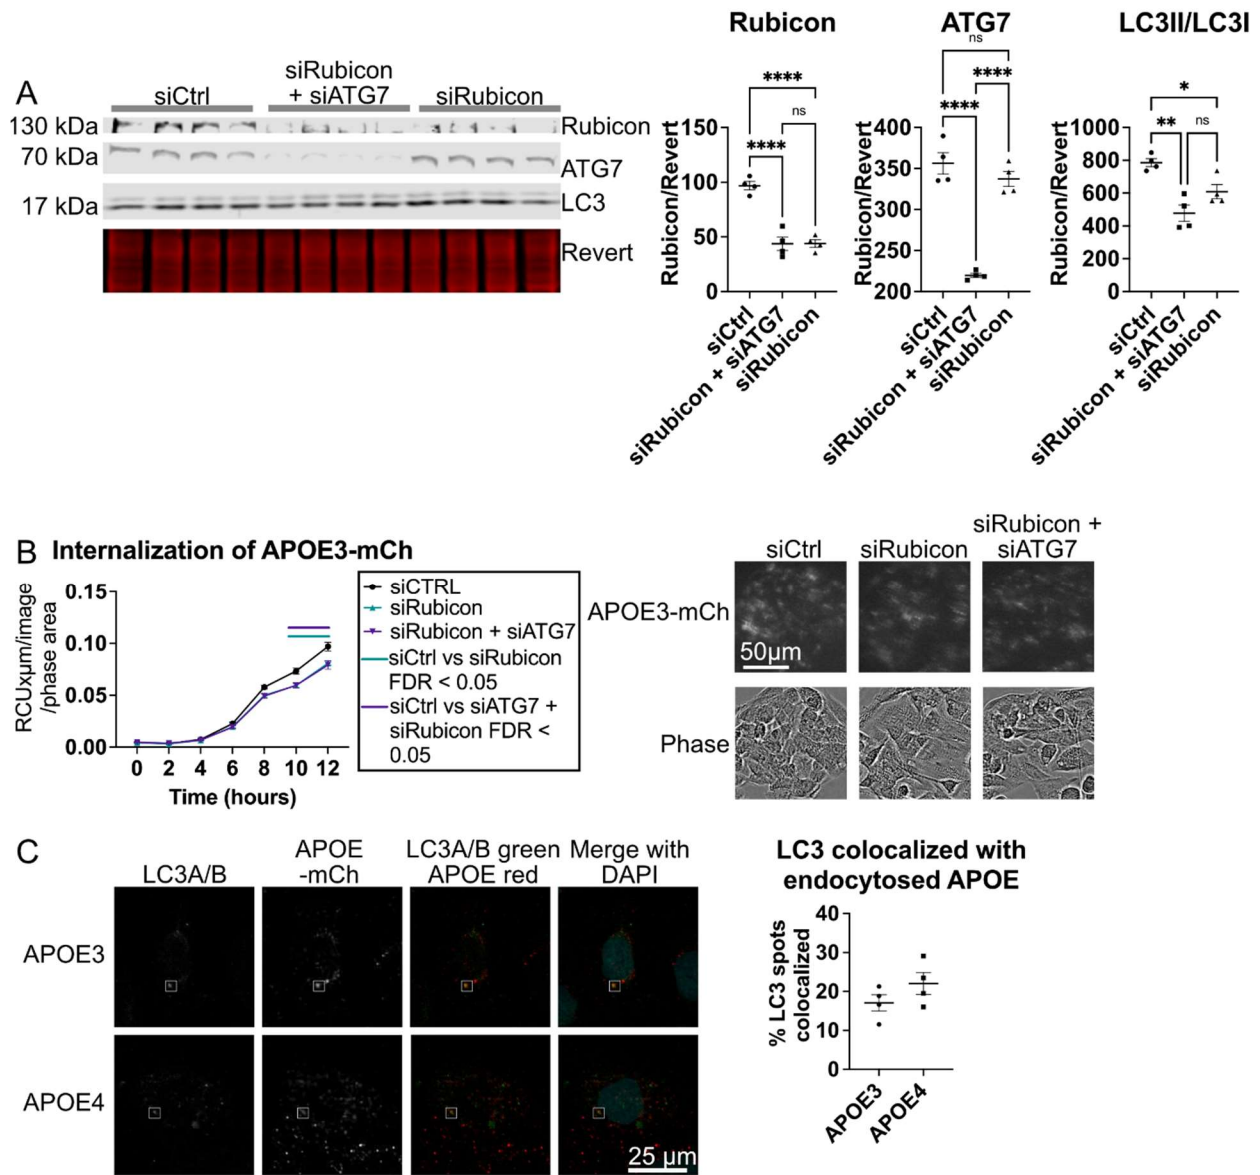

**Fig. S8. Validation of Rubicon knockdown and co-knockdown of Rubicon and ATG7.** (A) HepG2 cells were reverse transfected with siCtrl, siCtrl+ siATG7 or siRubicon, or siATG7 and siRubicon in equal amounts. Western blot was used to validate knockdown. (B) HepG2 siRNA transfected cells were treated with APOE3-mCh conditioned media and imaged using Incucyte. (C) ST14A cells were treated with APOE-mCh conditioned media for 24 hrs and co-stained with mCh and LC3A/B, imaged by confocal microscopy and analyzed using Imaris.

**Table S1. LysoIP Proteomics Results.**

| Accession | Description | Abundance<br>Ratio:<br>(APOE4)<br>(APOE3) | Abundance<br>Ratio:<br>(Vector)<br>(APOE3) | Abundance<br>Ratio:<br>(Vector)<br>(APOE4) | Abundance<br>Ratio<br>Value:<br>(APOE4)<br>(APOE3) | Abundance<br>P-<br>Ratio<br>Value:<br>(Vector)<br>(APOE3) | Abundance<br>P-<br>Ratio<br>Value:<br>(Vector)<br>(APOE4) |
|-----------|-------------|-------------------------------------------|--------------------------------------------|--------------------------------------------|----------------------------------------------------|-----------------------------------------------------------|-----------------------------------------------------------|
| O95302    | FKBP9       | 0.073                                     | 0.871                                      | 11.986                                     | 0.002824986                                        | 0.915019508                                               | 0.003497797                                               |
| A6NJ78    | METTL15     | 0.098                                     | 0.16                                       | 1.64                                       | 0.03482823                                         | 0.191564201                                               | 0.416755153                                               |
| O95168    | NDUFB4      | 0.258                                     | 0.956                                      | 3.701                                      | 0.04188126                                         |                                                           |                                                           |
| P55036    | PSMD4       | 0.359                                     | 0.442                                      | 1.233                                      | 0.024837183                                        | 0.071143369                                               | 0.849642682                                               |
| Q6P587    | FAHD1       | 0.418                                     | 2.239                                      | 5.356                                      | 0.00922607                                         | 0.0404347                                                 | 0.001189686                                               |
| Q969V3    | NCLN        | 0.443                                     | 0.551                                      | 1.242                                      | 0.048365929                                        | 0.267834332                                               | 0.51366258                                                |
| E7EPT4    | NDUFV2      | 0.657                                     | 1.452                                      | 2.212                                      | 0.035113201                                        | 0.694864927                                               | 0.01111817                                                |
| P35232    | PHB         | 0.692                                     | 1.216                                      | 1.757                                      | 0.028869173                                        | 0.58957946                                                | 0.006270202                                               |
| P18827    | SDC1        | 1.315                                     | 0.01                                       | 0.01                                       | 0.045668619                                        |                                                           |                                                           |
| P28066    | PSMA5       | 1.926                                     | 1.848                                      | 0.96                                       | 0.032426471                                        | 0.080605384                                               | 0.831370351                                               |
| P46782    | RPS5        | 1.929                                     | 1.222                                      | 0.634                                      | 0.00726678                                         | 0.680894178                                               | 0.026505119                                               |
| J3KTA4    | DDX5        | 2.103                                     | 0.819                                      | 0.389                                      | 0.034558926                                        | 0.483428179                                               | 0.005640004                                               |
| P09382    | LGALS1      | 2.291                                     | 0.93                                       | 0.406                                      | 0.048483133                                        | 0.960807773                                               | 0.052606157                                               |
| Q15643    | GMAP-210    | 2.375                                     | 1.406                                      | 0.592                                      | 0.01726162                                         | 0.55353193                                                | 0.034916173                                               |
| O43752    | STX6        | 2.466                                     | 1.75                                       | 0.709                                      | 0.014994447                                        | 0.182800753                                               | 0.361533823                                               |
| B0YIW6    | ARCN1       | 2.593                                     | 2.2                                        | 0.849                                      | 0.03498909                                         | 0.096259352                                               | 0.7962403                                                 |
| Q7Z5L9    | IRF2BP2     | 2.636                                     | 0.517                                      | 0.196                                      | 0.049868561                                        | 0.095142061                                               | 0.001160372                                               |
| G3XAI2    | LAMB1       | 2.645                                     | 2.04                                       | 0.771                                      | 0.041885676                                        | 0.219122637                                               | 0.642624196                                               |
| P62269    | RSP18       | 2.973                                     | 0.776                                      | 0.261                                      | 0.018197747                                        | 0.972097635                                               | 0.012876609                                               |
| Q13724    | MOGS        | 3.016                                     | 2.47                                       | 0.819                                      | 0.049048219                                        | 0.08416334                                                | 0.936049822                                               |
| Q99961    | SH3GL1      | 3.104                                     | 1.665                                      | 0.536                                      | 0.013556205                                        | 0.25573337                                                | 0.096286662                                               |
| Q8IUH5    | ZDHHC17     | 4.889                                     | 0.01                                       | 0.01                                       | 0.019007889                                        | ND                                                        | ND                                                        |

**Table S2. Cell lines and APOE expression.**

| Name     | Cell type                        | APOE expression                                                    | Rationale                                                                                                                                              |
|----------|----------------------------------|--------------------------------------------------------------------|--------------------------------------------------------------------------------------------------------------------------------------------------------|
| HepG2    | Immortalized human hepatic cells | Endogenous APOE expression                                         | Previous work has shown lysosomal degradation of APOE in hepatic cells                                                                                 |
| ST14A    | Immortalized Rat neuronal cells  | Transient transfection                                             | Neuron-like immortalized cells may have increased relevance to neurodegenerative disease, morphology amenable to imaging, high transfection efficiency |
| HEK 293T | Human Embryonic Kidney cells     | Transient transfection                                             | Produce high yield and equal amounts of APOE2, APOE3, and APOE4 in conditioned media                                                                   |
| HEK 293  | Human Embryonic Kidney cells     | Stable expression via transfection and clonal antibiotic selection | Avoid stress of transfection reagents, avoid fluctuation of expression over time, avoid variability in transfection across isoforms                    |

**Table S3. Antibodies.**

| Target               | Company and Catalogue number         | Application, concentration   |
|----------------------|--------------------------------------|------------------------------|
| APOE                 | Biologend 803301                     | Western blot 1:500           |
| mCherry              | Biologend 677702                     | Western blot 1:500           |
| P62/SQSTM1           | Abnova PAB16850                      | Western blot 1:1000          |
| LAMP2A               | Boster M01573                        | Western blot 1:500           |
| LAMP2A               | ThermoFisher Scientific # 51-2200    | Western blot 1:1000          |
| Beclin1              | Boster Bio PB9076                    | Western blot 1:1000          |
| Mouse APOE           | Abcam ab183596                       | Western blot 1:1000          |
| APOE                 | Invitrogen 701241                    | Western blot 1:500           |
| GAPDH                | Invitrogen MA5-15738                 | Western blot 1:1000          |
| VPS35                | Boster Bio M01644                    | Western blot 1:500           |
| Rab7                 | Boster Bio PB9883                    | Immunocytochemistry<br>1:200 |
| Flag/DDK             | Origene TA180144                     | Western blot 1:1000          |
| LC3A/B               | Cell Signaling                       | Western blot 1:1000          |
| EEA1                 | Cell Signaling 2411S                 | Immunocytochemistry<br>1:200 |
| HA                   | Sigma H6908                          | Western blot 1:1000          |
| $\alpha$ -tubulin    | Sigma T6074-200                      | Western blot 1:2000          |
| ATG7                 | Millipore Sigma A2856                | Western blot 1:1000          |
| GFP                  | Takara 632569                        | Western blot 1:1000          |
| STX17                | Proteintech 17815-1-AP               | Western blot 1:500           |
| Secondary ms HRP     | Jackson Immuno Research<br>115035146 | Western blot 1:2000          |
| Secondary NIR 800 ms | Licor 92632210                       |                              |
| Secondary NIR 700 Rb | Licor 92632211                       | Western blot 1:2000          |

**Table S4. qPCR primers.**

| Target  | Species | Sequence (F)                | Sequence (R)                   |
|---------|---------|-----------------------------|--------------------------------|
| LAMP2A  | Rat     | GGCAATGCTACCTGTCTGC<br>TGGC | AGAATAAGTACTCCTCCC<br>AGGGCTGC |
| RPLPO   | Rat     | TGATCATCCAGCAGGTGTT<br>TGA  | ACAGACAAAGCCAGGAC<br>CCTTT     |
| APOE    | Human   | GGGTCGCTTTTGGGATTAC<br>CTG  | CAACTCCTTCATGGTCTC<br>GTCC     |
| RPLPO   | Human   | TGGTCATCCAGCAGGTGTT<br>CGA  | ACAGACACTGGCAACATT<br>GCGG     |
| LAMP2A  | Human   | GGCAATGATACTTGTCTGC<br>TGGC | GTAGAGCAGTGTGAGAAC<br>GGCA     |
| LAMP2B  | Human   | GAAGGAAGTGAACATCAG<br>CATG  | CAAGCCTGAAAGACCAGC<br>ACC      |
| Rubicon | Human   | CGACCTGGAAAAGGAGAA<br>TGCC  | TCCTCTAGGCACTGGCTC<br>ATCA     |
| Beclin1 | Human   | CTGGACACTCAGCTCAAC<br>GTCA  | CTCTAGTGCCAGCTCCTTT<br>AGC     |
| ATG7    | Human   | CGTTGCCACAGCATCATC<br>TTC   | CACTGAGGTTACCCATCC<br>TTGG     |
| LC3B    | Human   | GAGAAGCAGCTTCCTGTTC<br>TGG  | GTGTCCGTTACCAACAG<br>GAAG      |
| STX17   | Human   | TCCATGACTGTTGGTGGAG<br>CA   | CAGTGCAATTCCTGCACT<br>T        |

**Table S5. Statistical analyses.** All qPCR experiments were performed with technical triplicates and statistics for qPCR performed on dCT values. All incuocyte experiments included 3 or 4 images averaged for each well. T test: Two-tailed student's T test; significance:  $p < 0.05$  \*,  $p < 0.01$  \*\*,  $p < 0.001$  \*\*\*,  $p < 0.0001$  \*\*\*\*. One way ANOVA 1: One-way ANOVA with multiple comparisons correction; significance:  $p < 0.05$  \*,  $p < 0.01$  \*\*,  $p < 0.001$  \*\*\*,  $p < 0.0001$  \*\*\*\*. One way ANOVA 2: One-way ANOVA; significance:  $p < 0.05$  indicated by colored boxes. Two way ANOVA 1: Two-way mixed effects repeated measures ANOVA corrected for multiple comparisons with false discovery rate; Bars above graphs indicate time points at which significance was found. Significance: FDR  $< 0.05$ . Two way ANOVA 2: Two-way ANOVA with Tukey correction for multiple comparisons. Significance:  $p < 0.05$  \*,  $p < 0.01$  \*\*,  $p < 0.001$  \*\*\*,  $p < 0.0001$  \*\*\*\*.

| Figure      | Replicates                              | Statistical test |
|-------------|-----------------------------------------|------------------|
| 1A          | 4 wells per genotype                    | One-way ANOVA 1  |
| 1B          | 3 wells per treatment                   | One-way ANOVA 1  |
| 1C          | 4 wells per genotype                    | One-way ANOVA 1  |
| 2           | 4 wells per treatment                   | Two-way ANOVA 1  |
| 3A-B        | 3 wells per genotype, 3 images per well | T test           |
| 3C          | 4 wells per treatment                   | Two-way ANOVA 2  |
| 4 A-F, H, I | 6 wells per treatment or siRNA          | T test           |
| 4G          | 6 wells per treatment                   | T test           |
| 4J          | 4 wells per siRNA                       | One-way ANOVA 1  |
| 5B, E       | 4 wells per genotype and treatment      | Two-way ANOVA 1  |
| 5C          | 3 wells per treatment                   | T test           |
| 5D          | 3 wells per treatment                   | T test           |
| 5F          | 6 wells per treatment                   | T test           |
| 6A          | 6 wells per genotype/ treatment         | T test           |
| 6B          | 4 wells per genotype and treatment      | Two-way ANOVA 1  |
| 6C          | 3 animals per genotype                  | T test           |
| 7A          | 5 wells per conditioned media genotype  | Two-way ANOVA 1  |
| 7B          | 3 wells per conditioned media genotype  | Two-way ANOVA 1  |
| 7C          | 3 wells per genotype                    | Two-way ANOVA 2  |
| 7D          | 4 wells per conditioned media genotype  | One-way ANOVA 1  |
| 8A-B        | 6 wells per siRNA                       | Two-way ANOVA 1  |
| 8C          | 6 wells per siRNA                       | T test           |
| 8D          | 4 wells per treatment                   | T test           |
| 8E          | 5 wells per treatment                   | Two-way ANOVA 1  |
| S1A         | 4 wells per genotype                    | One-way ANOVA 1  |



|       |                                                           |                 |
|-------|-----------------------------------------------------------|-----------------|
| S1B   | 3 wells per treatment                                     | No statistics   |
| S1D   | 3 wells per treatment                                     | Two-way ANOVA 1 |
| S2A   | 6 wells per siRNA                                         | T test          |
| S2B   | 4 wells per siRNA                                         | T test          |
| S2C   | 6 wells per siRNA                                         | Two-way ANOVA 1 |
| S2D   | 4 wells per treatment                                     | T test          |
| S1E   | 4 wells per APOE3-mCh vs mCh transfection                 | T test          |
| S2F   | 3 wells per transfection and treatment                    | One-way ANOVA 1 |
| S3A   | 3 wells per conditioned media treatment                   | Two-way ANOVA 1 |
| S3C-D | 3 wells per treatment                                     | T test          |
| S4A   | 6 wells per genotype                                      | T test          |
| S4B   | 3 wells per shRNA or treatment                            | Two-way ANOVA 1 |
| S5A   | 3 wells per genotype                                      | T test          |
| S5B   | 3 wells per shRNA                                         | T test          |
| S5C   | 6 wells per shRNA                                         | Two-way ANOVA 1 |
| S6A   | 3 wells per conditioned media genotype                    | One-way ANOVA 1 |
| S7C   | 4 wells per conditioned media genotype                    | One-way ANOVA 2 |
| S8A   | 4 wells per siRNA                                         | One-way ANOVA 1 |
| S8B   | 5 wells per siRNA                                         | Two-way ANOVA 1 |
| S8C   | 4 wells per conditioned media genotype, 4 images per well | T test          |

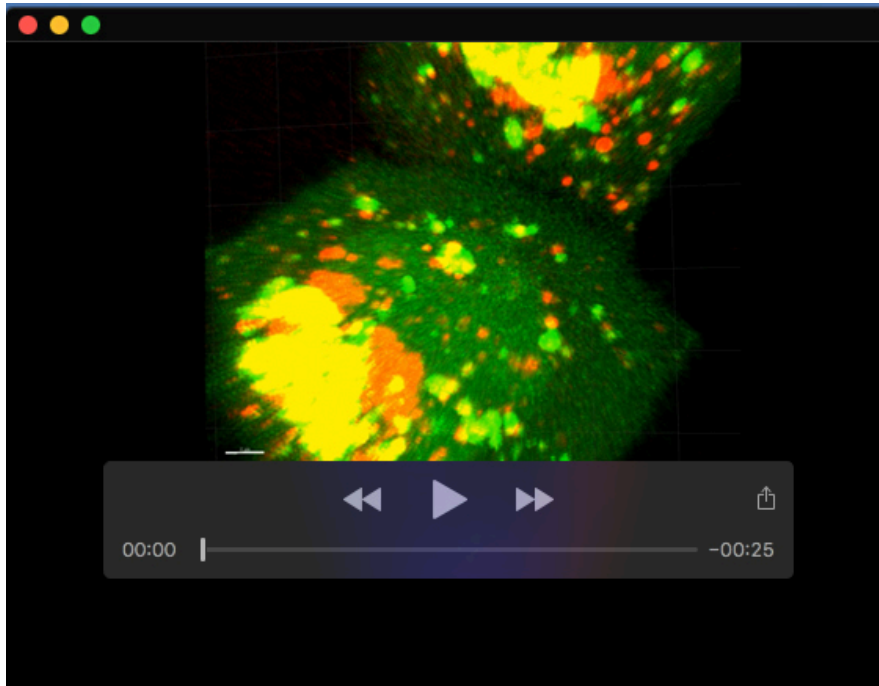

**Movie 1. APOE3-mCh is contained in LC3A-positive vesicles.** APOE3-mCh was co-transfected into HeLa cells with GFP-LC3A. Quantification of colocalization shown in Fig. S2E. 3-dimensional analysis was performed using Imaris software.

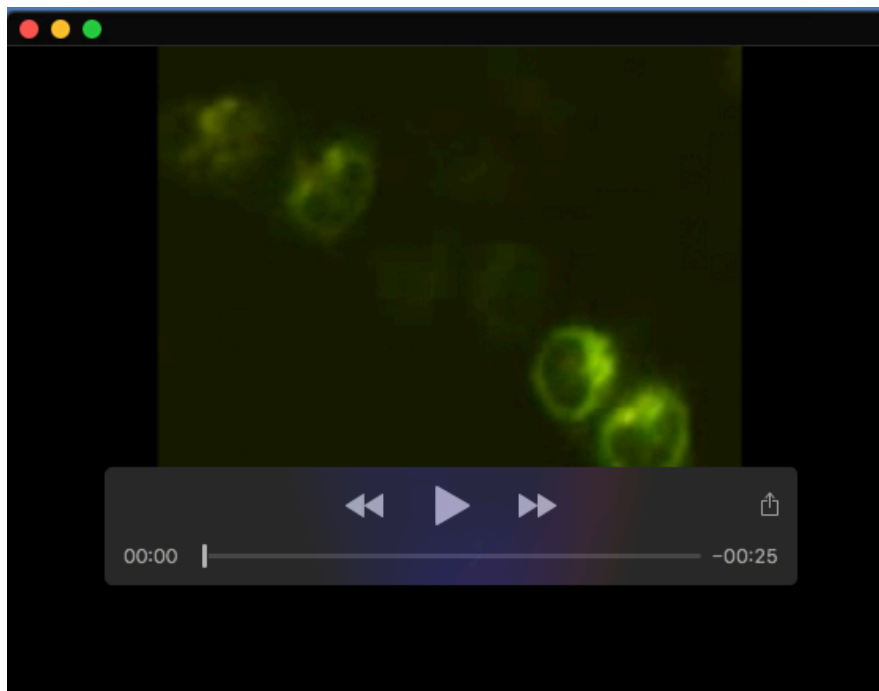

**Movie 2. Dual-tagged APOE3 transiently over-expressed in ST14A cells.** Dual-tag fluorescent APOE with quenching of green SepHluorin over time as APOE3 enters acidic compartments. Imaging was performed using Incucyte live cell analysis. Quantification in Fig. 5B.
